# Supplementary material for: Temporal dynamics of viral fitness and the adaptive immune response in HCV infection
Source: eLife. 2025 Aug 29;13:RP102232. doi: 10.7554/eLife.102232 (PMC12396813; doi:10.7554/eLife.102232)
Supplement: Figure 1—source data 1. [file elife-102232-fig1-data1.xlsx]

## Sheet: Figure1A-C
Subject	Days Post-infection	Viral load	HYPYRLWHY	DYPYRLWHY	GPRLGVRAT	HPNIEEVAL	YGKAIPLEVI	HAVGIFRAA	ALGVNAVAYY
300256	44	34149820
300256	58	19188760	750		25	150
300256	79	812622	125		25	10
300256	96	50774
300256	112	50	105	75	195	80	95	90	25
300256	129	693
300256	163	135	35		180	80
300256	287	14853	10		10	15
300256	301	732
300256	570	16421
300256	945	85835
Subject	Days Post-infection	Viral load	ARMVMMTHF	KLVAMGLNAV	TLSPYYKRYI	VRMVMMTHF	KLVAMGINAV
THDS1086MX	2
THDS1086MX	16	235662
THDS1086MX	30	549251
THDS1086MX	44	176550	655	1317.5
THDS1086MX	58	2005
THDS1086MX	72	108737	25	85	30		40
THDS1086MX	85	62043	355	1992.5	67.5
THDS1086MX	109	503981
THDS1086MX	198	681389	122.5	457.5	37.5
THDS1086MX	394	592520
THDS1086MX	583	223849
THDS1086MX	690	183426
Subject	Days Post-infection	Viral load	ARMVMMTHF	KLVAMGINAV	SILGIGTAL	SILGIGTVL	AWETARHTPV	TSILGIGTA	TSILGIGTV
THGS0684MX	2	140200
THGS0684MX	16	98867
THGS0684MX	30	78764	30	0	0	47.5		30
THGS0684MX	44	33763	147.5	95	77.5	50		95
THGS0684MX	58	19932
THGS0684MX	71	20374	30	35	405	70	50	230	100
THGS0684MX	95	28181	612.5	355	997.5	65		87.5
THGS0684MX	184	221964
THGS0684MX	395	686
THGS0684MX	569	75688
THGS0684MX	704	143746	0	65	40	0		110

## Sheet: Figure1D-F
D	Average SE	Rate of escape
	0.0285312	0.06254
	0.0261582	0.1243
	0.0236554	0.0664
	0.0372586	0.05648
	0.0427642	0.2685
	0.0460523	0.5098
	0.0449518	0.2582
	0.047403	0.2861
	0.0495784	0.1082
	0.0534734	0.4813
	0.0254735	0.0532
E	Average SE	Avg ELISPOT (SFU/million cell)
	0.0345175	25
	0.0602843	134
	0.0258559	21
	0.0375758	10
	0.023896	15
	0.0218269	10
	0.026147	10
	0.034805	93
F	Average SE	Avg ELISPOT (SFU/million cell)
	0.0204982	85
	0.0250619	25
	0.00971103	27.5
	0.0228354	85
	0.0632319	150
	0.0997333	750
	0.0502496	405
	0.0538922	50
	0.0310161	91
	0.0151653	484
	0.0312234	261
	0.0219952	854
	0.0412301	10
	0.044897	125
	0.0174331	55
