# Supplementary material for: Temporal dynamics of viral fitness and the adaptive immune response in HCV infection
Source: eLife. 2025 Aug 29;13:RP102232. doi: 10.7554/eLife.102232 (PMC12396813; doi:10.7554/eLife.102232)
Supplement: Figure 2—source data 1. [file elife-102232-fig2-data1.xlsx]

## Sheet: Sheet1
Subject	Days Post-infection	Viral load	NS5B		NS2		NS3
			Mean	SD	Mean	SD	Mean	SD
300023	36	19234350	0.5875	0.4125	1	0
	44	17907340	3.01025	1.89806	1	0
	60	8121396	1.56567	1.08478	0.462	0
	74	397185	3.01025	1.89806	0.845333	0.218732
	85	3218
	101	398
	135	2843176	0.305556	0.270998	0.673625	0.204872
	197	5896155	0.187667	0.115728	0.617	0
300240	44	54887					0.92665	0.194066
	57	85473					1.0638	1.21001
	71	64063
	85	6051
	99	497
	113	4862
	140	1034
	220	44449					0.00766667	0.00429
	310	29552
	538	62174					0.00206667	0.001461
300256	44	34149820					0.782947	0.39292
	58	19188760					0.289857	0.09833
	79	812622					0.207857	0.141114
	96	50774					0.33	0
	112	50
	129	693
	163	135
	287	14853					0.0208	0.012528
	301	732
	570	16421
	945	85835
HOKD0485FX	30	733849					0.357394	0.401423
	65
	73	175219					0.146678	0.101377
	80	44452					0.2373	0
	93	407392					0.15258	0.139218
	108	24969					0.0039	0
	121	77723					0.0115261	0.011152
	149	254245					0.00136667	0.001226
	170
	233	350658					0.000327273	0.000372
	446	956488
	618	102439
THDS1086MX	16	235662	1	0.411382	1	0	0.841	0.275396
	30	549251
	44	176550
	58	2005
	72	108737	0.0088	0.005845	1	0	0.328333	0.176353
	85	62043
	109	503981	0.0626667	0.041516	1	0	0.368	0.245145
	198	681389	0.0785	0.044167	0.853	0.254611	1.00263	0.748655
	394	592520
	583	223849
	690	183426
THGS0684MX	2	140200	0.5052	0.404063			0.465	0.439383
	16	98867
	30	78764
	44	33763
	58	19932	0.857	0.143			0.5612	0.363011
	71	20374
	95	28181
	184	221964	0.058	0.025981			0.5995	0.4425
	395	686
	569	75688
	704	143746
