# Supplementary material for: Temporal dynamics of viral fitness and the adaptive immune response in HCV infection
Source: eLife. 2025 Aug 29;13:RP102232. doi: 10.7554/eLife.102232 (PMC12396813; doi:10.7554/eLife.102232)
Supplement: Figure 3—source data 1. [file elife-102232-fig3-data1.xlsx]

## Sheet: Figure1D-F
Figure 3a	Avg ELISPOT (SFU/million cell)	Population fitness
	25	1
	27.5	0.93
	85	0.795
	150	1.064
	405	0.505
	50	0.561
	91	0.462
	484	1.566
	261	0.841
	854	3.01
	10	0.147
	125	0.328
	55	0.29
Figure3b	Average SE	Population fitness
	0.0404541	0.465
	0.0418339	0.505
	0.0204982	0.841
	0.0250619	1
	0.0717486	0.357
	0.0394483	1
	0.0328615	0.67
	0.00921493	1
	0.0107575	3.01
	0.00971103	0.93
	0.0389874	0.795
	0.0228354	1.064
	0.0632319	0.29
	0.0502496	0.561
	0.0538922	0.857
	0.0310161	0.462
	0.0151653	1.566
	0.0259169	0.147
	0.0425104	0.328
	0.0436802	0.009
	0.0312234	0.845
	0.0219952	3.01
	0.0412301	0.208
	0.0174331	0.237
	0.0401142	1
	0.0429482	1
Figure 3c	Rate of escape	Population fitness
	0.06254	0.795
	0.1243	1.064
	0.0664	0.505
	0.05648	0.561
	0.2685	0.462
	0.5098	1.566
	0.2582	0.841
	0.2861	3.01
	0.1082	0.147
	0.4813	0.328
	0.0532	0.29
Figure 3d	Avg ELISPOT (SFU/million cell)	Population fitness
	25	0.25
	134	0.674
	21	0.188
	10	0.063
	15	0.617
	10	0.079
	10	0.599
	93	0.058
Figure 3e	Average SE	Population fitness
	0.0644019	0.153
	0.0189477	0.33
	0.0345175	0.004
	0.0638992	0.368
	0.0599013	0.063
	0.0266274	0.012
	0.0602843	0.674
	0.0258559	0.306
	0.0375758	0.001
	0.0515054	0.599
	0.053009	0.058
	0	0.617
	0.0503137	0.188
	0.0573012	0.878
	0.0511638	0.079
	0.0272703	0.008
	0.0638926	0.0003
	0.023896	0.021
	0.034805	0.002
	0.0629917	1
	0.0626459	0.852894
Figure 3f	Rate of escape	Population fitness
	0.06254	0.008
	0.1243	0.25
	0.0664	0.674
	0.05648	0.188
	0.2685	0.063
	0.5098	0.617
	0.2582	0.079
	0.2861	0.599
	0.1082	0.058
