# Supplementary material for: Temporal dynamics of viral fitness and the adaptive immune response in HCV infection
Source: eLife. 2025 Aug 29;13:RP102232. doi: 10.7554/eLife.102232 (PMC12396813; doi:10.7554/eLife.102232)
Supplement: Figure 5—source data 1. [file elife-102232-fig5-data1.xlsx]

## Sheet: Figure 5a-b
Figure 5a	CD8+ T cells	nAbs
4087	56	56
277	95	95
360	44	71
Figure 5b	CD8+ T cells	nAbs
THD	44	394
THG	30	395
23	36	74
HOK	80	446
240	44	538
256	58	945

## Sheet: Figure 5c-e
Subject	Days Post-infection	Viral load	Neutralisation	NS5B	NS2	NS3	CD8 ELISpot Sum SFC/10^6
THGS0684MX	2		0
	16	235662	0			0.841
	30	549251	0
	44	176550	0				1972.5
	58	2005	0
	72	108737	0			0.328333	140
	85	62043	0				2415
	109	503981	0			0.368
	198	681389	45			1.00263	617.5
	394	592520	90
	583	223849	90
	690	183426	90
THGS0684MX	2		0
	16	235662	0			0.841
	30	549251	0
	44	176550	0				1972.5
	58	2005	0
	72	108737	0			0.328333	140
	85	62043	0				2415
	109	503981	0			0.368
	198	681389	45			1.00263	617.5
	394	592520	90
	583	223849	90
	690	183426	90
300023		0
	36	19234350	0	0.5875	1		18
	44	17907340	0	3.01025	1		0
	60	8121396	0	1.56567	0.462		685
	74	397185	53.6	3.01025	0.845333		1831
	85	3218	0
	101	398	0				726
	135	2843176	0	0.305556	0.673625		155
	197	5896155	134.5	0.187667	0.617		111
	365	516945	65.5				25
	635	14738					375
	781	344388
